# Supplementary material for: Histone H3 and H4 Modifications Point to Transcriptional Suppression as a Component of Winter Freeze Tolerance in the Gall Fly Eurosta solidaginis
Source: MDPI journal article supplement (doi:10.3390/ijms241210153), 2023-06-15
Supplement: s1 [file s1]

Representative whole Western immunoblot images

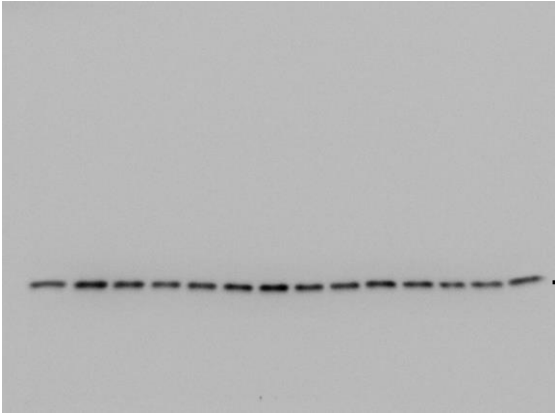

H3K4me1  
17 kDa

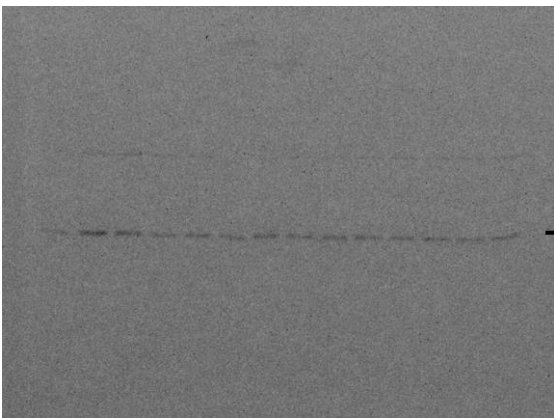

H3K4me2  
17 kDa

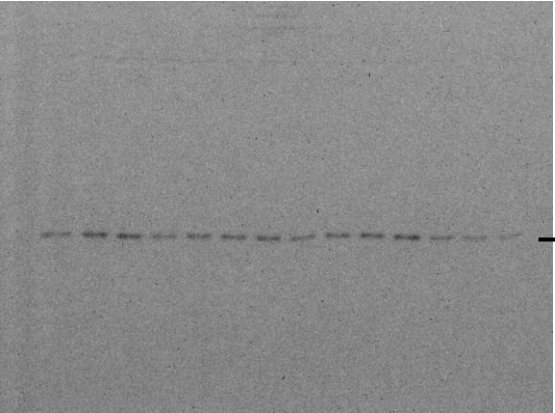

H3K4me3  
17 kDa

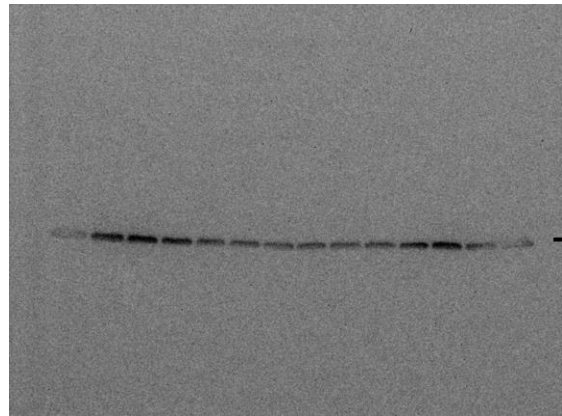

H3K9me2  
17 kDa

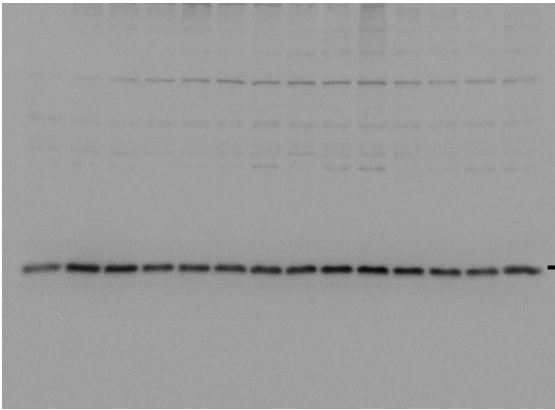

H3K9me3  
17 kDa

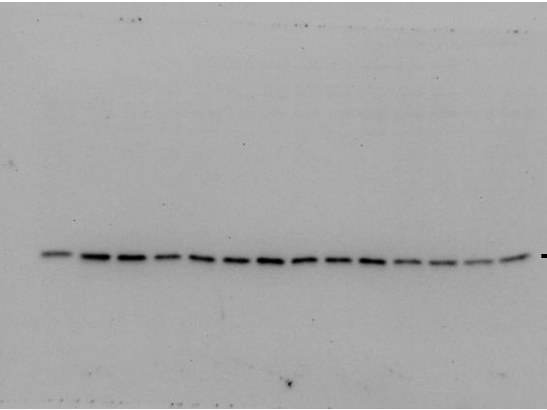

H3K27me1  
17 kDa

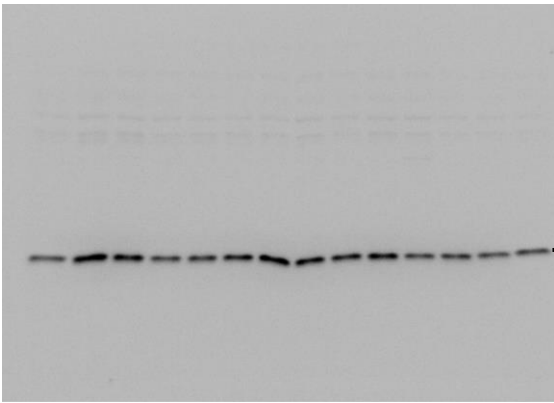

H3K36me2  
17 kDa

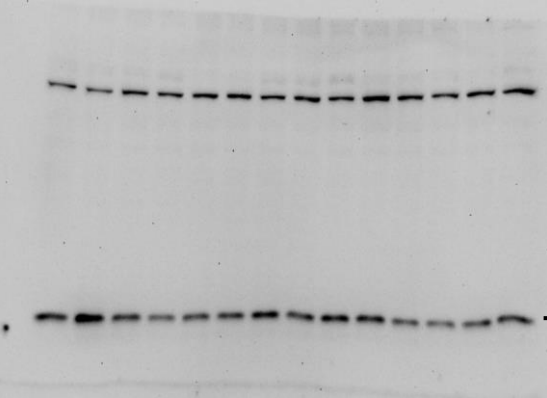

~50 kDa

H3K79me2  
17 kDa

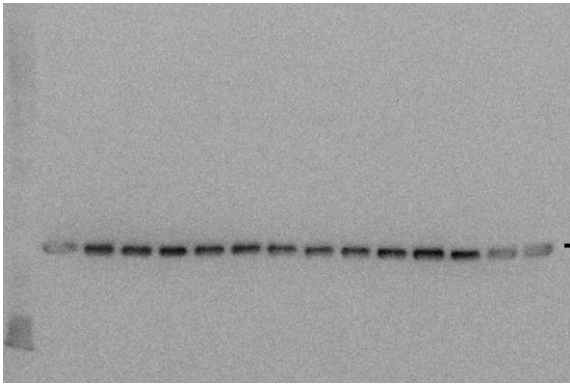

H3  
17 kDa

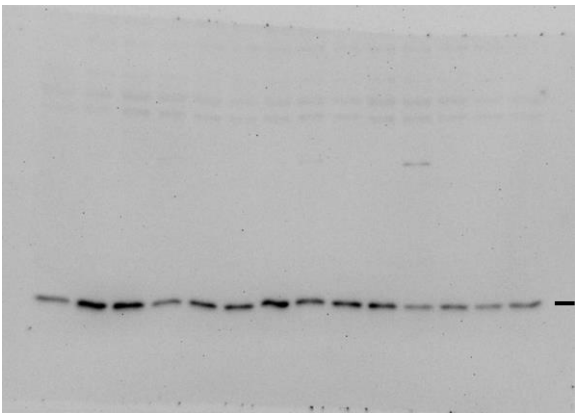

H4K20me1  
12 kDa

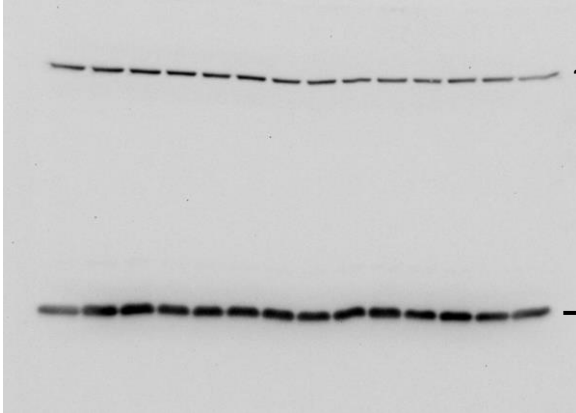

~50 kDa  
H4K20me3  
12 kDa

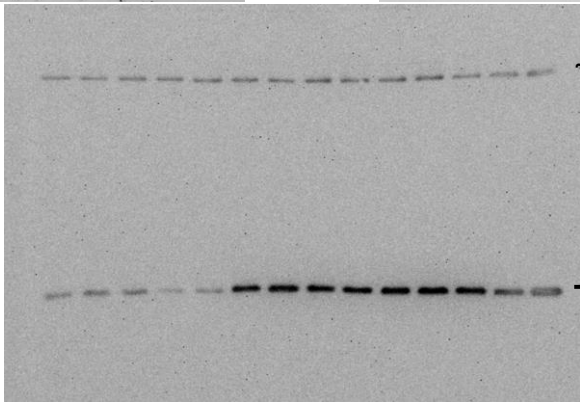

H4  
12 kDa

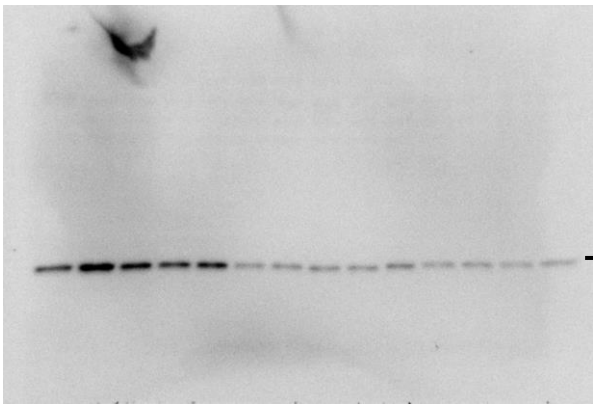

H3K9ac  
17 kDa

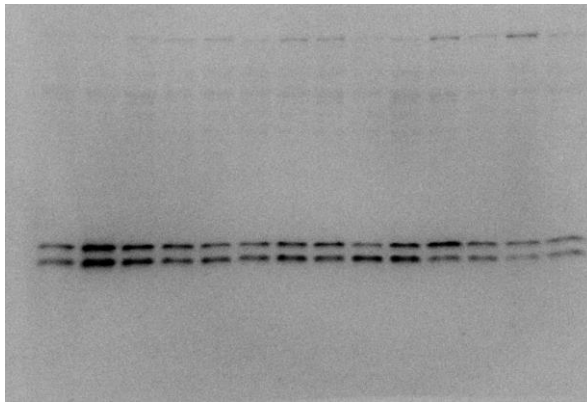

H3K14ac  
17 kDa

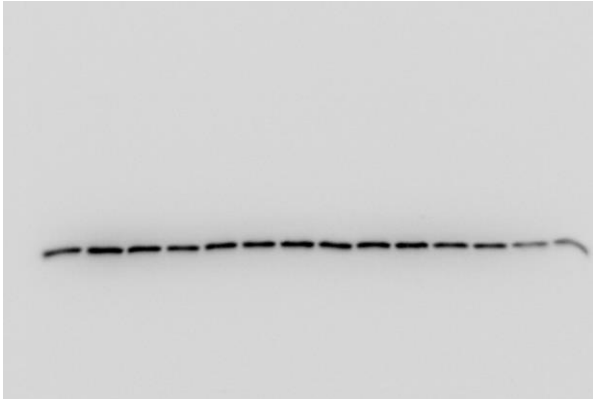

H3K18ac  
17 kDa

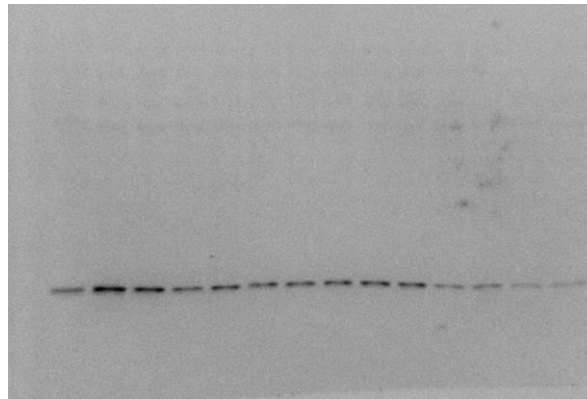

H3K27ac  
17 kDa

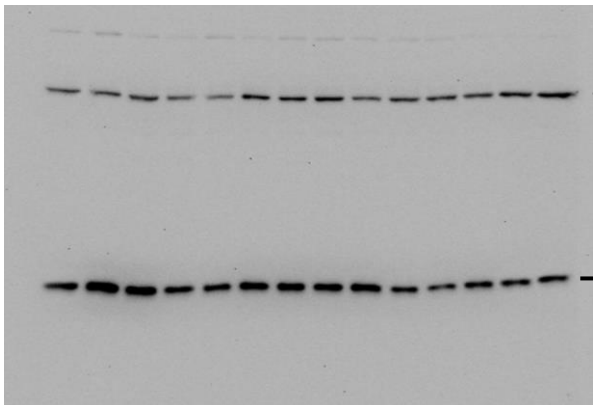

~50 kDa  
H3R2me2a  
17 kDa

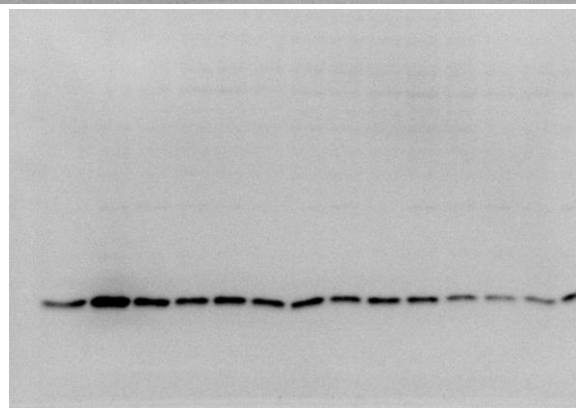

H4K8ac  
12 kDa

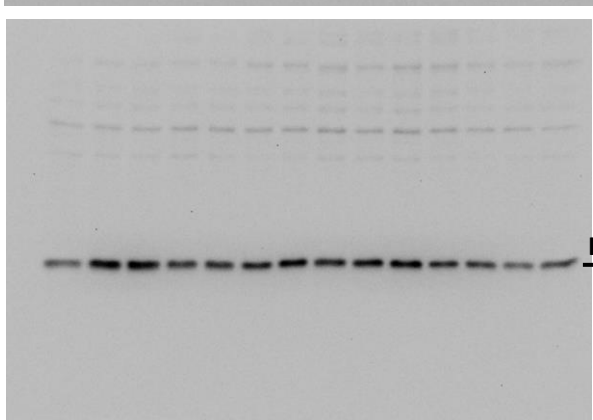

H3R26me2a  
17 kDa

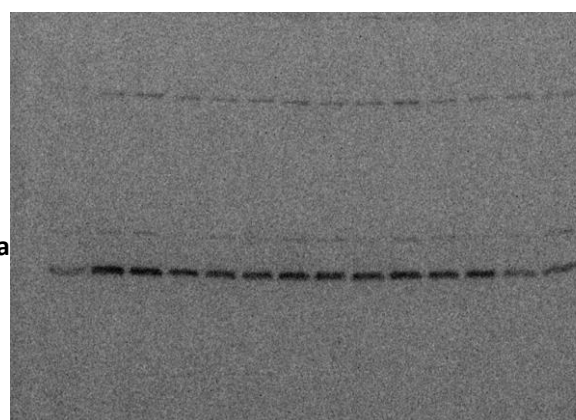

H4R3me2a  
12 kDa
